1 Partitioning protein ParP directly links chemotaxis to biofilm dispersal in *Pseudomonas*  
2 *aeruginosa*.

3 Jesse M. Reinhardt and Sonia L. Bardy<sup>#</sup>

4

5 Department of Biological Sciences, University of Wisconsin-Milwaukee, Milwaukee Wisconsin  
6 USA

7

8 Running Head: ParP directly links chemotaxis and biofilm dispersal

9

10 <sup>#</sup>address correspondence to: Sonia L. Bardy, [bardy@uwm.edu](mailto:bardy@uwm.edu).

## 11 **Abstract**

12           The recent characterization of partitioning proteins in the localization of chemotaxis  
13 signal transduction systems was proposed to have broad implications for polarly-flagellated non-  
14 enterobacteriaceae gamma-proteobacteria. These studies showed that the loss of either  
15 partitioning protein resulted in equivalent reductions in swimming motility and chemotaxis  
16 protein localization and inheritance. However, the role of these chemotaxis partitioning proteins  
17 outside of *Vibrio spp.* remains untested. Our studies on the chemotaxis partitioning proteins in  
18 *Pseudomonas aeruginosa* revealed an unexpected role for the partitioning protein ParP. While  
19 the *P. aeruginosa* ParC and ParP homologs are needed for wild type swimming motility, the loss  
20 of ParP results in a greater swimming defect compared to the *parC* mutant. Our studies revealed  
21 that the Par-like proteins directly interact with each other and the chemotaxis system, and ParP  
22 interacts with DipA. Deletion of *dipA* results in a similar defect in swimming motility as the  
23 *parP* mutant. ParP has an interdependence for polar cluster formation, but not localization, with  
24 both CheA and DipA, and CheA cluster formation is partially dependent on ParP. Due to the  
25 direct interactions and interdependence of cluster formation of ParP and DipA, and the similar  
26 phenotypes of the *parP* and *dipA* mutants, further investigation into the role of ParP in biofilm  
27 dispersion is warranted.

## 28 **Importance**

29           Impaired chemotaxis protein cluster formation or inheritance reduces chemotaxis which  
30 can have an impact on of the virulence of a bacterium. In some gamma-proteobacteria there are  
31 systems in place to ensure that chemotaxis proteins, like chromosomes and plasmids, are  
32 localized for optimal chemotaxis and that daughter cells inherit their own clusters for use after  
33 cell division. Par-like proteins have been implicated in the partitioning and localization of

34 chemotaxis proteins and the chemotactic ability of *Vibrio spp.* and *Rhodobacter sphaeroides* [1-  
35 3]. We propose that Par-like proteins can do more than localize chemotaxis proteins to the poles  
36 of the cells. In *P. aeruginosa*, they bring together other key proteins involved in regulating  
37 flagellar-based motility, and we propose they function as a critical link between biofilm dispersal  
38 and motility.

## 39 **Introduction**

40 Spatial organization within bacterial cells results in the arrangement of proteins in distinct  
41 subcellular locations. This organization is not always static, and in some instances, can change in  
42 response to external cues or different stages within the bacterial lifecycle [4, 5]. There are a  
43 significant number of cellular processes that are affected by spatial organization and polarity,  
44 including signal transduction and motility. Bacterial chemotaxis is mediated by a two-component  
45 chemosensory system wherein a motile bacterium senses chemo-effectors in its environment and  
46 responds by moving towards favorable or away from unfavorable conditions. This system is  
47 best-studied in *Escherichia coli* where upon ligand binding, transmembrane methyl-accepting  
48 chemotaxis proteins (MCPs) will transduce the signal across the cytoplasmic membrane to the  
49 chemotaxis histidine kinase, CheA. CheA and the scaffolding protein CheW interact with the  
50 signaling domain of the MCP. The activation of CheA results in trans-autophosphorylation and  
51 transfer of the phosphate group to the response regulators CheY or CheB [6]. Phosphorylated  
52 CheY diffuses to the flagellar motor to cause a change in flagellar rotation, which results in a  
53 random change in swimming direction [7].

54 Specific localization patterns are known to be critical for optimal signal transduction [1,  
55 8]. In *Vibrio cholera*, a polarly-flagellated gamma-proteobacterium, polar chemotaxis protein  
56 clusters are required for chemotaxis [1]. The Par-like proteins are required for proper cluster

57 formation and localization of the polar chemotaxis proteins [1, 2]. ParC and ParP are  
58 homologous to ParA and ParB, which are partitioning (Par) proteins that are used for partitioning  
59 plasmids and chromosomes upon cell division. Deletion of the Par-like proteins of *V. cholerae*  
60 altered flagellar rotation, swimming motility, and chemotaxis protein localization [1, 2].  
61 Specifically, deletion of *parC* or *parP* from *Vibrio parahaemolyticus* resulted in a ~25-30%  
62 decrease in swimming motility and ~50-60% of cells either having aberrant chemotaxis protein  
63 localization or partitioning [2]. The Par proteins mark the old pole and are recruited through the  
64 diffusion and capture of ParC by a HubP-dependent anchor. ParP interacts with both MCPs and  
65 CheA, thereby stimulating array formation [9]. These chemotaxis partitioning proteins are  
66 conserved in all polarly-flagellated gamma-proteobacteria [1].

67 *Pseudomonas aeruginosa*, another Gram-negative polarly-flagellated gamma-  
68 proteobacterium, is ubiquitous in the environment and commonly found in water, soil and on  
69 man-made structures [10]. It can act as an opportunistic pathogen and significantly contributes to  
70 morbidity and mortality in chronic infections in Cystic Fibrosis patients [11]. In *P. aeruginosa*,  
71 the chemotaxis system controlling swimming motility is encoded in two gene clusters, cluster I  
72 (*che I*) and cluster V, and the encoded proteins localize to the poles [12, 13]. Within *che I* are  
73 genes encoding for ParC and ParP homologs that may have importance in swimming motility  
74 and chemotaxis protein localization.

75 Spatial organization in *P. aeruginosa* is driven through a polar determinant called the  
76 polar organelle coordinator, or POC, complex for the flagellum, type IV pili, and chemotaxis  
77 proteins [14]. The POC complex consists of three proteins: TonB3, PocA, and PocB, which are  
78 currently known to sit at the top of the flagellar localization hierarchy above FlhF [14]. In *tonB3*,  
79 *pocA*, and *pocB* mutants, FlhF, CheA, and the flagellum are mislocalized from the cell pole.

80 After the POC complex, FlhF is above all other known proteins for polar flagellar localization  
81 [15, 16]. Deletion of *flhF* results in mislocalized chemotaxis proteins and flagella, and reduced  
82 swimming motility [14]. Aside from FlhF and the Poc complex, there are no other major polar  
83 determinants of the chemotaxis system proteins known in *P. aeruginosa*.

84 Motility of *P. aeruginosa* is also affected by levels of bis-(3'→5')-cyclic dimeric  
85 guanosine monophosphate (c-di-GMP), a bacterial second messenger that also regulates biofilm  
86 formation and dispersion, differentiation, and virulence [17, 18]. In regards to chemotaxis and  
87 biofilm formation, c-di-GMP levels are widely known to dictate the switch between motile  
88 (planktonic) and sessile (biofilm) states of growth. While there are obvious benefits to growing  
89 in a biofilm, bacterial cells can revert to planktonic growth. Environmental signals such as  
90 glutamate or succinate trigger *P. aeruginosa* to switch from a biofilm to a planktonic mode of  
91 growth – this process is known as biofilm dispersion. Biofilm dispersion requires DipA, a c-di-  
92 GMP phosphodiesterase, to mediate a cellular reduction of c-di-GMP levels [18-20].

93 DipA is also involved in chemotaxis and its absence results in defects in swimming and  
94 swarming motility in bulk population assays [21]. *P. aeruginosa* exhibits individual cell c-di-  
95 GMP heterogeneity due to the asymmetrical inheritance of DipA [16]. Most *dipA* mutant cells  
96 have high levels of c-di-GMP, which results in an overall reduction in average cell velocity and  
97 flagellar reversals. DipA is polarly-localized and forms a complex with the flagellum and CheA.  
98 The localization of DipA is completely dependent on the presence of the chemotaxis histidine  
99 kinase CheA and the phosphorylation of CheA promotes DipA PDE activity [16].

100 In our studies, we determined what effect the loss of the Par-like proteins has on  
101 swimming motility and chemotaxis protein cluster formation and localization in *P. aeruginosa*  
102 PAO1. We performed a bacterial two-hybrid assay to identify proteins that interact with the Par-

103 like proteins. Finally, we examine the interdependence on cluster formation of the Par-like  
104 proteins with CheA and DipA. Our experiments suggest that the Par-like protein ParP is involved  
105 in the recruitment of the biofilm dispersal protein DipA to the flagellated pole.

106

## 107 **Results**

108 **Par-like proteins are required for optimal chemotaxis in *Pseudomonas aeruginosa*.** The  
109 chemotaxis gene cluster *che I* of *P. aeruginosa* encodes most of the genes required for  
110 chemotactic control of flagellar-based motility [13]. This includes the *par*-like genes *parC* and  
111 *parP* (Fig. 1A). Homologs of these genes are found in other polarly-flagellated non-  
112 Enterobacteriaceae  $\gamma$ -proteobacteria [2]. In *V. parahaemolyticus*, individual or double deletions  
113 of *parC<sub>Vp</sub>* and *parP<sub>Vp</sub>* resulted in a ~25-30% defect in swimming motility. This swimming defect  
114 was due to an increase in the percentage of the cell population that lack chemotaxis protein foci  
115 or have mislocalized (non-polar) chemotaxis protein foci [2]. Due to the amino acid sequence  
116 homology between ParC and ParP in *V. parahaemolyticus* and *P. aeruginosa* and the conserved  
117 genetic organization surrounding these genes, ParC and ParP were proposed to be important for  
118 swimming motility in *P. aeruginosa*. Deletion of *parC* and *parP* resulted in a 25% and 70%  
119 reduction in swimming motility, respectively, and could be partially complemented through  
120 expression of His-tagged fusion proteins (Fig. 1B). These results suggested that ParP has a more  
121 important role in chemotaxis than ParC. Negative controls for swimming motility and  
122 chemotaxis are provided by the *fliC::tn* mutant and cluster I mutant respectively. The *parC* and  
123 *parP* mutants have a similar growth rate as wild type, demonstrating that the swimming defect is  
124 not due to a growth defect (data not shown). Given that the swimming defect seen in the *parP<sub>Pa</sub>*

125 mutants was significantly different from that reported in *Vibrio* [2], we further investigated the  
126 roles of these partitioning proteins in *P. aeruginosa*.

127 **Chemotaxis protein localization is dependent on the Par-like proteins.** To determine the  
128 cause of the swimming motility defects in the *parC<sub>Pa</sub>* and *parP<sub>Pa</sub>* mutants, we examined CheA  
129 (histidine kinase) localization and expression. The chemotaxis proteins of *P. aeruginosa*  
130 normally localize to the poles of the cell [22]. It has been previously demonstrated in *V.*  
131 *parahaemolyticus* that deletion of *parC<sub>Vp</sub>*, *parP<sub>Vp</sub>*, or both resulted in 50-60% of cells having a  
132 reduction in either chemotaxis protein foci formation or polar localization [2]. Through  
133 fluorescence microscopy, it was determined that in *P. aeruginosa* ParC and ParP were required  
134 for wild type levels of chemotaxis protein foci formation (Fig. 2). CheA-mTurquoise (CheA-  
135 mTq) expressed from the native site in the chromosome was used as a marker for chemotaxis  
136 protein foci formation and localization [16] as CheA, along with CheW and MCPs, are required  
137 for higher order clustering [23]. As a control, CheA foci formation was tested in the *cheW*  
138 mutant and showed a 96% reduction as previously published [22]. CheA foci formation was  
139 reduced by ~45-50% in the *parC<sub>Pa</sub>* and *parP<sub>Pa</sub>* deletion mutants (Fig. 2B). Surprisingly, in the  
140 *parC<sub>Pa</sub>* and *parP<sub>Pa</sub>* deletion strains, the localization of CheA foci remained largely unchanged  
141 compared to wild type. This suggests that the Par-like proteins are more important for foci  
142 stability or inheritance as opposed to localization in *P. aeruginosa*. The three amino acid residues  
143 that are different between CheA from PAO1 and PA14 do not affect function as the *P.*  
144 *aeruginosa* PAO1 strain expressing CheA-mTq from PA14 was capable of wild type chemotaxis  
145 (Fig. 2D) and therefore its use was justified for localization studies. The CheA-mTq fusion  
146 protein was present in all mutant backgrounds (Fig. 2B), demonstrating that the lack of foci  
147 formation was not due to reduced levels of CheA. Curiously, western blotting suggested that

148 CheA-mTq levels were slightly higher in the mutants compared to wild type (Fig. 2C). The  
149 reason for this increase in CheA levels remains to be determined.

150 **DipA interacts with ParP<sub>Pa</sub> and affects swimming motility.** Because deletion of the *par*-like  
151 genes affected swimming motility and chemotaxis protein foci formation in our work and in the  
152 recent studies in *Vibrio spp.*, we investigated protein interactions between ParC<sub>Pa</sub> and ParP<sub>Pa</sub> as  
153 well as chemotaxis proteins and MCPs [1, 2, 9]. Given that the genome of *P. aeruginosa* is  
154 reported to encode 23 MCPs that feed into the flagellar based chemotaxis system, a single  
155 representative MCP (PA2867) was assayed for interaction with the Par-like proteins. A bacterial  
156 two-hybrid (B2H) assay showed that ParC<sub>Pa</sub> and ParP<sub>Pa</sub> directly and strongly interact with each  
157 other and weakly interact with CheA and the MCP (Fig. 3). ParC<sub>Pa</sub> could self-interact, thus  
158 further suggesting that it is acting as a ParA-like protein [2, 24].

159         It was previously reported in *P. aeruginosa* strain PA14, that CheA co-  
160 immunoprecipitated with the phosphodiesterase PA5017 (hereafter referred to as DipA for  
161 clarity within the literature) [16]. This indicated that CheA and DipA form a complex with each  
162 other, but it was not known if this interaction was direct or indirect. DipA is known to be  
163 involved in biofilm dispersion and swimming motility and its ability to form polar foci and  
164 degrade c-di-GMP is dependent on CheA [16, 18, 20]. Because the Par-like proteins affect  
165 swimming motility and CheA foci formation, DipA and the Par proteins were assayed for direct  
166 interactions to determine if the Par proteins aid in CheA/DipA complex formation. Strikingly, a  
167 B2H assay revealed that ParP<sub>Pa</sub> directly and strongly interacts with DipA (Fig. 3). No direct  
168 interaction could be detected between DipA and CheA or ParP and CheW using this assay.

169         In agreement with previous studies, the *dipA* mutant showed a 63% reduction in  
170 swimming motility [16]. This was similar to the 70% reduction in swimming motility seen in the



171 *parP<sub>Pa</sub>* mutant, yet these results were significantly different from each other (Fig. 4A).  
172 Complementation with His-DipA fully restored swimming motility to the *dipA* mutant (Fig. 4A).  
173 A Western blot confirmed that His-DipA was expressed (Fig. 4B).  
174 **DipA, ParP<sub>Pa</sub> and CheA polar localization is interdependent.** Given the similar phenotypes  
175 and direct interaction between ParP and DipA, we investigated the localization dependence of  
176 CheA, DipA and ParP<sub>Pa</sub> by fluorescence microscopy. CheA-mTq foci formation or localization  
177 remained unchanged in a *dipA* mutant, indicating that CheA localization is independent of DipA  
178 (Figs. 5A and B). Levels of CheA-mTq remained unchanged in the *dipA* mutant (Fig. 5C). Yfp-  
179 ParP<sub>Pa</sub> foci formation was reduced by 50% in a *dipA* mutant and 60% in a *cheA* mutant, but there  
180 was no change in localization (Fig. 6). DipA-Yfp foci formation was reduced by 50% in a *parP<sub>Pa</sub>*  
181 mutant and 95% in a *cheA* mutant (Fig. 7). The dependence of DipA on CheA for foci formation  
182 has been previously published [16]. Expression of the ParP and DipA fluorescent fusion proteins  
183 complemented the swimming defect of their respective mutant parent strains to the same levels  
184 as the His-tagged ParP and DipA proteins (data not shown), thereby demonstrating that these  
185 fusion proteins are as functional as the His-tagged versions. DipA was present at similar levels in  
186 all mutant backgrounds, demonstrating that a loss of foci formation was not due to altered  
187 protein levels (Fig. 7B). The levels of ParP fusion protein in the  $\Delta parP\Delta cheA$  and  $\Delta parP\Delta dipA$   
188 double deletion strains consistently appeared less than in  $\Delta parP$ , suggesting ParP stability may  
189 be affected by the loss of its interacting partners (Fig. 6B). Combined, the results of these  
190 fluorescence microscopy studies on ParC, ParP, CheA and DipA localization show that there is  
191 an interdependence on localization, particularly for ParP on CheA and DipA, DipA on ParP, and  
192 CheA on ParP (Fig. 8).

193

## 194 Discussion

195 Chemotaxis proteins localize to distinct regions within a bacterial cell – this localization  
196 can vary depending on if it is a random or ordered process. A variety of mechanisms have been  
197 proposed including membrane curvature, stochastic nucleation, nuclear exclusion and interaction  
198 with the Tol-Pal complex [25-29]. These different mechanisms may not be exclusive of each  
199 other as these studies focus on different bacteria such as *E. coli* and *Bacillus subtilis*, as well as  
200 different MCPs within the same species. In *E. coli*, MCPs localize to the poles as large clusters,  
201 yet small clusters and individual proteins can be seen at the lateral regions of the inner membrane  
202 [26]. Other organisms, such as *Vibrio spp.* and *R. sphaeroides*, have *par*-like genes in their  
203 chemotaxis gene clusters and the encoded proteins are used for chemotaxis protein cluster  
204 formation and localization [1-3]. *P. aeruginosa* has *par*-like genes encoded in its main  
205 chemotaxis gene cluster, *che I* (Fig. 1A), and this work provides convincing evidence that these  
206 Par-like proteins are involved in chemotaxis and linked to DipA, a c-di-GMP phosphodiesterase  
207 involved in biofilm dispersion and motility regulation.

208 The Par-like proteins are known to be involved in swimming motility, chemotaxis and  
209 polar array formation in *Vibrio spp.* [1, 2, 9]. Our work shows that in *P. aeruginosa*, ParC<sub>Pa</sub> and  
210 ParP<sub>Pa</sub> are needed for optimal swimming motility (Fig. 1B). Comparison of the phenotypes  
211 between *V. parahaemolyticus* and *P. aeruginosa* reveal that the *parP<sub>Vp</sub>* mutant has a swimming  
212 defect equal to the *V. parahaemolyticus parC* mutant. However, ParP<sub>Pa</sub> is distinct in that it  
213 appears to have a more significant role in swimming motility, and possible reasons for this will  
214 be discussed below.

215 The Par-like proteins are known to dimerize and interact with each other and with the  
216 chemotaxis system via CheA and the MCPs in *V. parahaemolyticus* [2, 9]. Our work confirms

217 that ParC<sub>Pa</sub> can dimerize and strongly interact with ParP<sub>Pa</sub>, and both proteins interact with CheA  
218 (Fig. 3). We did not observe ParP<sub>Pa</sub> self-interaction (data not shown). In agreement with earlier  
219 studies, it was determined that the Par-like proteins of *P. aeruginosa* interacted with a  
220 representative MCP, thus demonstrating that ParC<sub>Pa</sub> and ParP<sub>Pa</sub> are not linked to the chemotaxis  
221 system only via CheA [9]. Strikingly, we found that ParP<sub>Pa</sub> interacted strongly with DipA (Fig.  
222 3). These results are novel, as ParP<sub>Pa</sub> and DipA form the first direct link between the biofilm  
223 dispersion and chemotaxis systems. It was previously shown by co-immunoprecipitation that  
224 DipA and CheA form a complex, but it was not known if this was through direct or indirect  
225 interactions [16]. Additionally, this earlier publication focused on the role of DipA (referred to as  
226 Pch) in motility and did not address the role of this phosphodiesterase in biofilm dispersal [16,  
227 18].

228         The *dipA* mutant had a reduction in swimming motility that was similar, but significantly  
229 different to what was seen in the *parP<sub>Pa</sub>* mutant (Fig. 4A). Localization studies suggest that the  
230 motility defect may be due to the loss of ParP as well as altered c-di-GMP levels at the cell pole.  
231 In *P. aeruginosa* PA14, Kulasekara *et al* [16] showed that loss of DipA leads to a loss of c-di-  
232 GMP heterogeneity in individual cells, with most cells having high levels of c-di-GMP. A  
233 reduction in flagellar reversals and average cell velocity compared with wild type was also  
234 observed. These results suggest that c-di-GMP levels modulate flagellar reversals and cell  
235 velocity, however, the mechanism by which this occurs has not been determined but may involve  
236 a c-di-GMP effector protein. DipA forms polar foci at the flagellated pole with CheA. After cell  
237 division, one of the daughter cells will inherit the flagellum and a DipA cluster, which lowers the  
238 c-di-GMP levels in that cell, thus creating c-di-GMP heterogeneity in individual cells. The role  
239 of this heterogeneity is speculated to give a survival advantage to these cells in unpredictable

240 environments [16]. Individual cells with high or low c-di-GMP levels would likely tend to either  
241 attach to a surface and start biofilm formation or remain motile and spread to new areas. In this  
242 sense, at any moment, there are cells that are “primed” for either choice, depending on the  
243 environment. The presence of CheA is absolutely required for DipA polar localization and the  
244 phosphorylation activity of CheA promotes DipA PDE activity. The GTPase FlhF is required for  
245 polar localization of the flagellum, and in an *flhF* mutant, the flagellum is still produced but  
246 mislocalized from the pole [30]. This results in cells having reduced swimming and swarming  
247 motility. Loss of FlhF also results in a reduction of transcription of class II, III or IV flagellar  
248 genes [30]. FlhF is above CheA and DipA in terms of dictating polar localization, but not their  
249 association with each other [16]. The absence of FlhF results in the mislocalization of the  
250 flagellum, and CheA and DipA foci from the pole. This suggests that the flagellum, CheA and  
251 DipA form a complex at one pole of the cell. However, it is not known if these three components  
252 remain in a complex when they are mislocalized from the pole. By forming these protein  
253 complexes, new daughter cells will be more likely to inherit necessary chemotaxis proteins to be  
254 used right away or once they synthesize a new flagellum.

255         Using fluorescence microscopy, we tested chemotaxis protein localization in the absence  
256 of the Par-like proteins. Deletion of either ParC<sub>Pa</sub>, ParP<sub>Pa</sub> or CheW resulted in a loss of CheA  
257 cluster, or foci, formation, but not polar localization in *P. aeruginosa* (Fig. 2). Comparable  
258 results were seen for the Par-like proteins in *V. parahaemolyticus*, except that of the cells that  
259 had aberrant clustering, 50% of them had no clusters while the other 50% had non-polar clusters  
260 [2]. These results suggest that in *P. aeruginosa*, the Par-like proteins function more in cluster  
261 stability as opposed to localization, but we cannot rule out technical differences as the cause of  
262 this discrepancy. Our results for the loss of CheA cluster formation in a *cheW* mutant agree with

263 previously published work [22]. Interestingly, we show that the loss in CheA cluster formation  
264 also coincided with a slight increase in CheA levels in the cells (Fig. 2C). The absolute levels of  
265 MCP, CheW and CheA proteins can vary in a bacterium, but their stoichiometry appears to  
266 remain constant [6, 31]. Overexpression of a chemotaxis protein can reduce chemotaxis and  
267 cluster formation [31, 32]. One possible explanation for the reduction in CheA cluster formation  
268 in *P. aeruginosa* is that excess levels of CheA are present in the cell relative to the MCP and  
269 CheW proteins. However, our results do not show if the stoichiometry of MCP:CheW:CheA was  
270 altered - this would require further investigation.

271 The Par-like proteins are interdependent in their polar cluster formation. ParC<sub>Vp</sub> and  
272 ParP<sub>Vp</sub> are both needed for their cluster formation and polar localization in *V. parahaemolyticus*  
273 [2]. While we have not tested the interdependence of ParC<sub>Pa</sub> and ParP<sub>Pa</sub>, our work has shown that  
274 the clustering ability of ParP<sub>Pa</sub> is interdependent on both CheA and DipA and that loss of cluster  
275 formation is ~50% (Figs. 6 and 7). These results suggest that the interdependence of localization  
276 between these proteins are equally important in their cluster formation. In a previous study and in  
277 this work, DipA cluster formation requires CheA [16]. However, we found that CheA cluster  
278 formation and cellular levels are not dependent on DipA (Fig. 5).

279 In summary, this work showed that the Par-like proteins of *P. aeruginosa* PAO1 are  
280 involved in chemotaxis controlling swimming motility. Our results correlate well with other  
281 studies in terms of the effects of the Par-like proteins on swimming motility and chemotaxis  
282 protein foci formation. Notably, we found that ParP<sub>Pa</sub> plays a more significant role in swimming  
283 motility than ParC<sub>Pa</sub>. We discovered that the c-di-GMP phosphodiesterase DipA directly  
284 interacts with ParP<sub>Pa</sub> and that they have an interdependence in their cluster formation. These  
285 results suggest that ParP<sub>Pa</sub> and DipA work in the same pathway and this may be the mechanism

286 behind the large decrease in swimming motility in a *parP* mutant. We have provided compelling  
287 evidence that the chemotaxis and biofilm dispersion systems are linked together via DipA and  
288 ParP<sub>Pa</sub> (Fig. 8). When biofilm cells sense a nutrient cue to disperse, *dipA*, motility, and  
289 chemotaxis genes are upregulated, c-di-GMP levels decrease, the extracellular matrix is broken  
290 down, and cell adhesiveness is reduced [18, 20]. Due to this series of events, cells become motile  
291 and chemotactic, and leave the biofilm. This leads to the question of what role ParP<sub>Pa</sub> has in this  
292 process of dispersion and if DipA proteins can temporally, and perhaps spatially, switch between  
293 interactions with biofilm dispersal proteins and chemotaxis proteins, or if there are functionally  
294 separate pools of this protein within the cell. To our knowledge, the localization of DipA has not  
295 yet been determined in biofilm or biofilm-dispersed cells. Future studies will determine in more  
296 detail how the loss of ParP<sub>Pa</sub> has a greater defect in swimming motility than the loss of ParC<sub>Pa</sub>  
297 and if ParP<sub>Pa</sub> has a role in biofilm dispersion.

298

## 299 **Materials and Methods**

300 **Strains, plasmids, growth conditions and media used.** Lists of plasmids and strains used in  
301 this publication are in Supplemental Tables 1 and 2, respectively. All *P. aeruginosa* strains  
302 generated in the work are derived from *P. aeruginosa* PAO1 (Iglewski strain). Both *E. coli* and  
303 *P. aeruginosa* were grown in Lysogeny Broth (LB) with aeration and on LB 1.5% agar plates at  
304 37°C. Antibiotics were used at the following concentrations as appropriate: 50 µg/mL of  
305 gentamycin and 70 µg/mL of tetracycline for *P. aeruginosa* and 15 µg/mL of gentamycin, 30  
306 µg/mL of kanamycin, 25 µg/mL of chloramphenicol and 10 µg/mL of tetracycline for *E. coli*.

307 **Generation of deletion mutants and expression strains.** In-frame gene deletions of *cheA* and  
308 *parC* were generated by homologous recombination using the suicide vectors pEX18Tc or

309 pEX19Gm as previously described [33, 34]. Briefly, 1 Kb DNA fragments upstream and  
310 downstream of the genes of interest were PCR amplified and fused together through splicing by  
311 overlap extension (SOE) PCR using PAO1 DNA as template [35]. Primers are listed in  
312 Supplemental Table 3. Fusion constructs were sequenced to ensure no undesired mutations were  
313 introduced. This resultant fragment was cloned into pEX18Tc or pEX19Gm and transformed  
314 into *E. coli* S17-1 for mating into *P. aeruginosa* PAO1. Merodiploids were selected on  
315 tetracycline or gentamycin, as appropriate, with chloramphenicol [5 µg/mL] providing counter-  
316 selection against *E. coli*. Resolution of the merodiploids was achieved through 10% sucrose  
317 counter-selection, and the deletions were confirmed by PCR. Gene deletions of *cheW*, *dipA*, and  
318 *parP* were performed as above except the upstream and downstream 1 Kb DNA fragments  
319 included nine basepairs from the 5' and 3' ends of the target gene. This approach was used to  
320 reduce the likelihood of polar effects.

321       Incorporation of *cheA-mTq* into the native site of the chromosome was done using a  
322 *cheA-mTq*:pEX19Gm construct [16] as above. In this construct, *cheA* from *P. aeruginosa* PA14  
323 was used. The CheA amino acid sequences from strains PAO1 and PA14 are 99.6% identical,  
324 with three residues [E133A, A161V and P191S, respectively] being different between them. The  
325 *dipA-yfp* fusion was amplified, sequenced, and cloned into pJN105 [16, 36]. The *yfp-parP* fusion  
326 was generated by SOE PCR, sequenced and cloned into pJN105.

327 **Bacterial two-hybrid analysis.** Protein interactions were tested using the BacterioMatch II  
328 Two-Hybrid System (Agilent Technologies). Briefly, the overnight cultures of the test strains  
329 were diluted to equal cell density. Five ten-fold serial dilutions of each culture were made and 5  
330 µl of each was spotted on non-selective and dual-selective plates containing antibiotics and  
331 IPTG. The dual-selective plates had 5 mM 3-AT and 10 µg/ml streptomycin to test the strength

332 of the protein interactions. The negative control strain harbored empty pBT and pTRG vectors,  
333 while the positive control strain harbored *lgf2*:pBT and *gallI*:pTRG as supplied by the  
334 manufacturer. The pBT and pTRG constructs were made using standard cloning techniques. The  
335 pairwise interactions tested included ParP-ParP, ParC-ParC, ParP-DipA, ParC-DipA, ParP-  
336 CheA, ParP-CheW, ParC- PA2867<sub>161-490</sub>, and ParP- PA2867<sub>161-490</sub>. PA2867 is a transmembrane  
337 receptor/MCP, and so a truncated version (PA2867<sub>161-490</sub> or tPA2867) containing only the C-  
338 terminal cytoplasmic portion was used.

339 **SDS-PAGE and western blot.** Whole cell lysates were prepared from mid-late log (OD<sub>600</sub> 0.5-  
340 1) liquid cultures (37°C, with aeration). The cells were harvested and suspended in 2X SDS  
341 loading buffer, and loading was normalized based on OD<sub>600</sub>. Whole cell lysates were separated  
342 by SDS-PAGE, and stained using Coomassie brilliant blue G-250 - perchloric acid solution [37].  
343 The primary antibodies were  $\alpha$ -His (1:3000),  $\alpha$ -mCherry (1:1000) and  $\alpha$ -GFP (1:1000).  
344 Secondary antibodies (1:10,000) conjugated to peroxidase allowed detection of signal using the  
345 SuperSignal West Femto Maximum Sensitivity Substrate kit. Western blots were visualized and  
346 imaged using a Fotodyne FOTO/Analyst FX system.

347 **Swimming assay.** Fresh *P. aeruginosa* colonies were stab inoculated into swimming media (1%  
348 tryptone, 0.5% NaCl and 0.3% agar) with antibiotics as appropriate. Following incubation at  
349 30°C for 18 hours, the diameter of the swimming zones were measured. For each assay, 12  
350 biological replicates were performed. ANOVA calculations were followed by the Tukey HSD  
351 post-hoc test using the R Console program (Version 3.2.3).

352 **Fluorescence microscopy.** Overnight cultures of *P. aeruginosa* were sub-cultured in LB broth  
353 with antibiotics as appropriate, and grown for three hours (with aeration at 37°C), resulting in  
354 cultures in mid-late log phase (OD<sub>600</sub> 0.5 - 1). 5  $\mu$ l of culture was spotted onto a polylysine-



355 treated coverslip (Fisherbrand 25CIR-1D) for observation using a Nikon Eclipse 90*i* microscope  
356 with a Hamamatsu digital camera C11440 (ORCA-Flash 4.0) and a Nikon Intensilight C-GHFI  
357 halogen lamp. Images were captured under DIC, Yfp, and Cfp filters, as appropriate. For  
358 quantitation of localization patterns, between 248 and 300 cells were scored for foci formation  
359 and localization. Foci were labeled as being polar if they fell within the curvature of the poles or  
360 non-polar if they did not.

361 **Protein alignment.** Clustal Omega multiple sequence alignment was used for comparing the  
362 amino acid sequences of multiple proteins [38].

363

364 **Acknowledgements:** The authors thank Zachary Zawada and Ashton Novy for their  
365 contributions. We also thank Samuel Miller for indicated plasmid. The University of Washington  
366 *Pseudomonas aeruginosa* transposon mutant collection is supported by NIH P30 DK089507.

367

368

- 369 1. Ringgaard S, Schirner K, Davis B, Waldor M. A family of ParA-like ATPases promotes  
370 cell pole maturation by facilitating polar localization of chemotaxis proteins. *Genes and*  
371 *Development*. 2011;25:1544-55. doi: 10.1101/gad.2061811. PMID: PMC3143943
- 372 2. Ringgaard S, Zepeda-Rivera M, Wu X, Schirner K, Davis B, Walder M. ParP prevents  
373 dissociation of CheA from chemotactic signaling arrays and tethers them to a polar anchor.  
374 *Proceedings of the National Academy of Sciences USA*. 2014;111:E255-64. doi:  
375 10.1073/pnas.1315722111. PMID: PMC3896188

- 376 3. Roberts M, Wadhams G, Hadfield K, Tickner S, Armitage J. ParA-like protein uses  
377 nonspecific chromosomal DNA binding to partition protein complexes. Proceedings of the  
378 National Academy of Sciences USA. 2012;109:6698-703. doi: 10.1073/pnas.1114000109.  
379 PMID: PMC3340030
- 380 4. Treuner-Lange A, Sogaard-Andersen L. Regulation of cell polarity in bacteria. The  
381 Journal of Cell Biology. 2014;206(1):7-17. doi: 10.1083/jcb.201403136.
- 382 5. Heering J, Ringgaard S. Differential Localization of Chemotactic Signaling Arrays  
383 during the Lifecycle of *Vibrio parahaemolyticus*. Front Microbiol. 2016;7:1767. doi:  
384 10.3389/fmicb.2016.01767. PMID: PMC5090175.
- 385 6. Wadhams G, Martin A, Warren A, Armitage J. Requirements for chemotaxis protein  
386 localization in *Rhodobacter sphaeroides*. Molecular Microbiology. 2005;48:895-902. doi:  
387 10.1111/j.1365-2958.2005.04880.x.
- 388 7. Sarkar MK, Paul K, Blair D. Chemotaxis signaling protein CheY binds to the rotor  
389 protein FliN to control the direction of flagellar rotation in *Escherichia coli*. Proceedings of the  
390 National Academy of Sciences. 2010;107(20):9370-5. doi: 10.1073/pnas.1000935107.
- 391 8. O'Connor JR, Kuwada NJ, Huangyutitham V, Wiggins PA, Harwood CS. Surface  
392 sensing and lateral subcellular localization of WspA, the receptor in a chemosensory-like system  
393 leading to c-di-GMP production. Mol Microbiol. 2012;86(3):720-9. doi: 10.1111/mmi.12013.  
394 PMID: PMC3501340.
- 395 9. Ringgaard S, Yang W, Alvarado A, Schirner K, Briegel A. Chemotaxis arrays in *Vibrio*  
396 species and their intracellular positioning by the ParC/ParP system. Journal of Bacteriology.  
397 2018. Epub 12 March 2018. doi: 10.1128/JB.00793-17.

- 398 10. Diaz MH, Hauser AR. *Pseudomonas aeruginosa* cytotoxin ExoU is injected into  
399 phagocytic cells during acute pneumonia. *Infect Immun*. 2010;78(4):1447-56. doi:  
400 10.1128/IAI.01134-09. PMID: PMC2849415.
- 401 11. Fulcher N, Holliday P, Klem E, Cann M, Wolfgang M. The *Pseudomonas aeruginosa*  
402 Chp chemosensory system regulates intracellular cAMP by levels modulating adenylate cyclase  
403 activity. *Molecular Microbiology*. 2010;76:889-904. doi: 10.1111/j.1365-2958.2010.07135.x.  
404 PMID: PMC2906755.
- 405 12. Masduki A, Nakamura J, Ohga T, Umezaki R, Kato J, Ohtake H. Isolation and  
406 characterization of chemotaxis mutants and genes of *Pseudomonas aeruginosa*. *J Bacteriol*.  
407 1995;177(4):948-52. PMID: PMC176688.
- 408 13. Kato J, Nakamura T, Kuroda A, Ohtake H. Cloning and characterization of chemotaxis  
409 genes in *Pseudomonas aeruginosa*. *Biosci Biotechnol Biochem*. 1999;63:155-61. doi:  
410 10.1271/bbb.63.155.
- 411 14. Cowles K, Moser T, Siryaporn A, Nyakudarika N, Dixon W, Turner J, et al. The putative  
412 Poc complex controls two distinct *Pseudomonas aeruginosa* polar motility mechanisms.  
413 *Molecular Microbiology*. 2013;90:923-38. doi: 10.1111/mmi.12403. PMID: PMC4666538
- 414 15. Pandza S, Baetens M, Park CH, Au T, Keyhan M, Matin A. The G-protein FlhF has a  
415 role in polar flagellar placement and general stress response induction in *Pseudomonas putida*.  
416 *Mol Microbiol*. 2000;36(2):414-23.
- 417 16. Kulasekara BR, Kamischke C, Kulasekara HD, Christen M, Wiggins PA, Miller SI. c-di-  
418 GMP heterogeneity is generated by the chemotaxis machinery to regulate flagellar motility.  
419 *Elife*. 2013;2:e01402. doi: 10.7554/eLife.01402. PMID: PMC3861689.

- 420 17. Romling U, Galperin MY, Gomelsky M. Cyclic di-GMP: the first 25 years of a universal  
421 bacterial second messenger. *Microbiol Mol Biol Rev.* 2013;77(1):1-52. doi:  
422 10.1128/MMBR.00043-12. PMID: PMC3591986.
- 423 18. Roy A, Petrova O, Sauer K. The phosphodiesterase DipA (PA5017) is essential for  
424 *Pseudomonas aeruginosa* biofilm dispersion. *Journal of Bacteriology.* 2012 194:2904-15. doi:  
425 10.1128/JB.05346-11. PMID: PMC3370607
- 426 19. Petrova OE, Sauer K. PAS domain residues and prosthetic group involved in BdlA-  
427 dependent dispersion response by *Pseudomonas aeruginosa* biofilms. *J Bacteriol.*  
428 2012;194(21):5817-28. doi: 10.1128/JB.00780-12. PMID: PMC3486124.
- 429 20. Basu Roy A, Sauer K. Diguanylate cyclase NicD-based signalling mechanism of  
430 nutrient-induced dispersion by *Pseudomonas aeruginosa*. *Molecular Microbiology.*  
431 2014;94(4):771-93. doi: 10.1111/mmi.12802.
- 432 21. Li Y, Xia H, Bai F, Xu H, Yang L, Yao H, et al. Identification of a new gene PA5017  
433 involved in flagella-mediated motility, chemotaxis and biofilm formation in *Pseudomonas*  
434 *aeruginosa*. *FEMS Microbiol Lett.* 2007;272(2):188-95. doi: 10.1111/j.1574-6968.2007.00753.x.
- 435 22. Guvener Z, Tifrea D, Harwood C. Two different *Pseudomonas aeruginosa* chemosensory  
436 signal transduction complexes localize to cell poles and remould in stationary phase. *Molecular*  
437 *Microbiology.* 2006;61:106-18. doi: 10.1111/j.1365-2958.2006.05218.x.
- 438 23. Briegel A, Wong ML, Hodges HL, Oikonomou CM, Piasta KN, Harris MJ, et al. New  
439 insights into bacterial chemoreceptor array structure and assembly from electron  
440 cryotomography. *Biochemistry.* 2014;53(10):1575-85. doi: 10.1021/bi5000614. PMID:  
441 PMC3985956.

- 442 24. Dmowski M, Jagura-Burdzy G. Mapping of the interactions between partition proteins  
443 Delta and Omega of plasmid pSM19035 from *Streptococcus pyogenes*. *Microbiology*.  
444 2011;157(Pt 4):1009-20. doi: 10.1099/mic.0.045369-0.
- 445 25. Saaki TNV, Strahl H, Hamoen LW. Membrane curvature and the Tol-Pal complex  
446 determine polar localization of the chemoreceptor Tar in *E. coli*. *J Bacteriol*. 2018. doi:  
447 10.1128/JB.00658-17.
- 448 26. Greenfield D, McEvoy A, Shroff H, Crooks G, Wingreen N, Betzig E, et al. Self-  
449 organization of the *Escherichia coli* chemotaxis network imaged with super-resolution light  
450 microscopy. *PLoS Biology*. 2009;7:e1000137. doi: 10.1371/journal.pbio.1000137. PMID:  
451 PMC2691949
- 452 27. Thiem S, Sourjik V. Stochastic assembly of chemoreceptor clusters in *Escherichia coli*.  
453 *Mol Microbiol*. 2008;68(5):1228-36. doi: 10.1111/j.1365-2958.2008.06227.x.
- 454 28. Strahl H, Ronneau S, Gonzalez BS, Klutsch D, Schaffner-Barbero C, Hamoen LW.  
455 Transmembrane protein sorting driven by membrane curvature. *Nat Commun*. 2015;6:8728. doi:  
456 10.1038/ncomms9728. PMID: PMC4632190.
- 457 29. Neeli-Venkata R, Startceva S, Annala T, Ribeiro AS. Polar Localization of the Serine  
458 Chemoreceptor of *Escherichia coli* Is Nucleoid Exclusion-Dependent. *Biophys J*.  
459 2016;111(11):2512-22. doi: 10.1016/j.bpj.2016.10.024. PMID: PMC5153539.
- 460 30. Murray TS, Kazmierczak BI. FlhF is required for swimming and swarming in  
461 *Pseudomonas aeruginosa*. *J Bacteriol*. 2006;188(19):6995-7004. doi: 10.1128/JB.00790-06.  
462 PMID: PMC1595508.
- 463 31. Sourjik V, Armitage JP. Spatial organization in bacterial chemotaxis. *EMBO J*.  
464 2010;29(16):2724-33. doi: 10.1038/emboj.2010.178. PMID: PMC2924652.

- 465 32. Cardozo MJ, Massazza DA, Parkinson JS, Studdert CA. Disruption of chemoreceptor  
466 signalling arrays by high levels of CheW, the receptor-kinase coupling protein. *Mol Microbiol.*  
467 2010;75(5):1171-81. doi: 10.1111/j.1365-2958.2009.07032.x. PMID: PMC5699227.
- 468 33. Hoang TT, Karkhoff-Schweizer RR, Kutchma AJ, Schweizer HP. A broad-host-range  
469 Flp-FRT recombination system for site-specific excision of chromosomally-located DNA  
470 sequences: application for isolation of unmarked *Pseudomonas aeruginosa* mutants. *Gene.*  
471 1998;212(1):77-86.
- 472 34. Jansari VH, Potharla VY, Riddell GT, Bardy SL. Twitching motility and cAMP levels:  
473 signal transduction through a single methyl-accepting chemotaxis protein. *FEMS Microbiol Lett.*  
474 2016;363(12). doi: 10.1093/femsle/fnw119.
- 475 35. Horton RM, Cai ZL, Ho SN, Pease LR. Gene splicing by overlap extension: tailor-made  
476 genes using the polymerase chain reaction. *Biotechniques.* 1990;8(5):528-35.
- 477 36. Newman JR, Fuqua C. Broad-host-range expression vectors that carry the L-arabinose-  
478 inducible *Escherichia coli* araBAD promoter and the araC regulator. *Gene.* 1999;227(2):197-203.
- 479 37. Faguy DM, Bayley DP, Kostyukova AS, Thomas NA, Jarrell KF. Isolation and  
480 characterization of flagella and flagellin proteins from the Thermoacidophilic archaea  
481 *Thermoplasma volcanium* and *Sulfolobus shibatae*. *Journal of Bacteriology.* 1996;178(3):902-5.
- 482 38. Sievers F, Wilm A, Dineen D, Gibson TJ, Karplus K, Li W, et al. Fast, scalable  
483 generation of high-quality protein multiple sequence alignments using Clustal Omega. *Mol Syst*  
484 *Biol.* 2011;7:539. doi: 10.1038/msb.2011.75. PMID: PMC3261699.
- 485 39. Simon R, Priefer U, Pühler A. A Broad Host Range Mobilization System for In Vivo  
486 Genetic Engineering: Transposon Mutagenesis in Gram Negative Bacteria. *Bio/Technology.*  
487 1983;1:784. doi: 10.1038/nbt1183-784.

488 **Figure Legends**

489 **Fig. 1.** Par-like proteins encoded within chemotaxis gene cluster I (*che I*) are required for  
490 optimal swimming motility. A) *che I* gene cluster of *P. aeruginosa* (drawn to scale). B)  
491 Swimming motility assay of wild type (PAO1) and indicated *P. aeruginosa* strains.  $\Delta$ *che I* strain  
492 lacks the chemotaxis genes *cheY*, *cheZ*, *cheA*, *cheB*, and *cheW*. The average swimming diameter  
493 measurements are shown and error bars denote the standard error of the mean. Matching letters  
494 indicate statistically significant differences,  $p < 0.001$ . (V) indicates empty vector (pJN105).

495

496 **Fig. 2.** The Par-like proteins affect chemotaxis protein localization. A) Representative images of  
497 CheA:mTq foci formation in wild type (PAO1) and indicated *P. aeruginosa* strains. B)  
498 Quantitation of CheA:mTq foci localization in the indicated *P. aeruginosa* strains. 248 cells per  
499 strain were counted. C) CheA:mTq expression levels as determined through western blotting. D)  
500 Expression of CheA:mTq supports swimming motility. Average swimming diameter is shown  
501 and error bars denote the standard error of the mean. All values were significantly different from  
502 wild type,  $p < 0.001$ .

503

504 **Fig 3.** DipA interacts directly with ParP, as demonstrated by a bacterial two-hybrid assay. 5  $\mu$ l of  
505 a 10-fold dilution series are spotted from left to right. Cultures on the non-selective media  
506 function as a loading control, while dual-selective media reveals the strength of the protein-  
507 protein interactions. Strong interactions have growth to the right-most spot, as indicated by the  
508 positive control *lgf2* and *gallI*.

509

510 **Fig. 4.** Deletion of DipA results in a similar reduction of swimming motility as seen in  $\Delta$ *parP*.

511 (A) Swimming motility assay of indicated *P. aeruginosa* strains. The averaged swimming  
512 diameters are shown and error bars denote standard error of the mean. Matching letters indicate  
513 statistically significant differences,  $p > 0.001$ . (B) Western blot showing expression of His-DipA.

514

515 **Fig. 5.** DipA is not required for CheA foci formation or localization. (A) Representative images  
516 of CheA-mTq foci formation in wild type and mutant *P. aeruginosa* strains. (B) Quantitation of  
517 CheA-mTq foci formation and localization in the indicated *P. aeruginosa* strains. 300 cells were  
518 counted per strain. (C) Western blot showing CheA-mTq levels.

519

520 **Fig. 6.** DipA and CheA influence ParP foci formation. (A) Representative images of Yfp-ParP  
521 foci formation in wild type and mutant *P. aeruginosa* strains. (B) Western blot showing Yfp-  
522 ParP levels in the indicated strains. (C) Quantitation of Yfp-ParP foci formation and localization  
523 patterns in the indicated *P. aeruginosa* strains. 300 cells were counted per strain.

524

525 **Fig. 7.** DipA foci formation is influenced by ParP and dependent on CheA. (A) Representative  
526 images of DipA-Yfp foci formation in wild type and mutant *P. aeruginosa* strains. (B) Western  
527 blot showing DipA-Yfp levels in the indicated strains. (C) DipA-Yfp foci formation and  
528 localization patterns in the indicated *P. aeruginosa* strains. 300 cells were counted per strain.

529

530 **Fig. 8.** Model showing B2H interactions linking the Par-like proteins with the chemotaxis and  
531 biofilm dispersion systems of *P. aeruginosa*. Black arrows indicate direct protein-protein  
532 interactions, with thicker arrows being a stronger interaction. The green dashed arrow points to  
533 the different roles that DipA has in regards to biofilm dispersion and chemotaxis. The red arrow



534 pointing down indicates a decrease in c-di-GMP levels. The blue arrow represents a nutrient cue  
535 that is sensed by NicD.

536

537

538 **Supplemental Table 1: Plasmids used in this study**

| <b>Plasmid</b>                       | <b>Description</b>                                                                                             | <b>Source</b> |
|--------------------------------------|----------------------------------------------------------------------------------------------------------------|---------------|
| $\Delta cheA$ :pEX18Tc               | DNA fusion product for deletion of <i>cheA</i> cloned into the EcoRI (5') and BamHI (3') sites of pEX18Tc      | This study    |
| $\Delta cheW$ :pEX18Tc               | DNA fusion product for deletion of <i>cheW</i> cloned into the EcoRI (5') and BamHI (3') sites of pEX18Tc      | This study    |
| $\Delta dipA$ :pEX18Tc               | DNA fusion product for deletion of <i>dipA</i> cloned into the EcoRI (5') and SacI (3') sites of pEX18Tc       | This study    |
| $\Delta parC$ :pEX18Tc               | DNA fusion product for deletion of <i>parC</i> cloned into the EcoRI (5') and BamHI (3') sites of pEX18Tc      | This study    |
| $\Delta parP$ :pEX18Gm               | DNA fusion product for deletion of <i>parP</i> cloned into the EcoRI (5') and HindIII (3') sites of pEX18Gm    | This study    |
| <i>cheA-mTq</i> :pEX18Gm             | DNA fusion product for insertion of <i>cheA-mTurquoise</i> at the native chromosomal site, cloned into pEX18Gm | [16]          |
| <i>dipA-yfp</i> :pUC18T-mini-TN7T-Gm | Plasmid template for amplifying <i>dipA-yfp</i>                                                                | [16]          |
| pJN105                               | Broad host range vector. pBBR-1 MCS5 AraC-pBAD derivative                                                      | [36]          |
| his- <i>cheW</i> :pJN105             | his- <i>cheW</i> cloned into the EcoRI (5') and SacI (3') sites of pJN105                                      | This study    |
| his- <i>dipA</i> :pJN105             | his- <i>dipA</i> cloned into the EcoRI (5') and XmaI (3') sites of pJN105                                      | This study    |
| <i>parC</i> :pJN105                  | <i>parC</i> cloned into the EcoRI (5') and XbaI (3') sites of pJN105                                           | This study    |
| <i>parC</i> -his:pJN105              | <i>parC</i> -his cloned into the EcoRI (5') and XbaI (3') sites of pJN105                                      | This study    |
| his- <i>parP</i> :pJN105             | his- <i>parP</i> cloned into the EcoRI (5') and SacI (3') sites of pJN105                                      | This study    |

539

|                         |                                                                                                                                  |            |
|-------------------------|----------------------------------------------------------------------------------------------------------------------------------|------------|
| <i>dipA-yfp</i> :pJN105 | <i>dipA-yfp</i> amplified from <i>dipA-yfp</i> :pUC18T-mini-TN7T-Gm and cloned into the EcoRI (5') and XbaI (3') sites of pJN105 | This study |
| <i>yfp-parP</i> :pJN105 | DNA fusion product <i>yfp-parP</i> cloned into the EcoRI (5') and SacI (3') sites of pJN105                                      | This study |

|                   |                                                                     |                      |
|-------------------|---------------------------------------------------------------------|----------------------|
| pBT               | Expression vector used for Bacterial Two-Hybrid                     | Agilent Technologies |
| pTRG              | Expression vector used for Bacterial Two-Hybrid                     | Agilent Technologies |
| <i>cheA</i> :pTRG | <i>cheA</i> cloned into the BamHI (5') and EcoRI (3') sites of pTRG | This study           |
| <i>dipA</i> :pBT  | <i>dipA</i> cloned into the NotI (5') and EcoRI (3') sites of pBT   | This study           |
| <i>mcpS</i> :pTRG | <i>mcpS</i> cloned into the XhoI (5') and NotI (3') sites of pTRG   | This study           |
| <i>parC</i> :pBT  | <i>parC</i> cloned into the NotI (5') and EcoRI (3') sites of pBT   | This study           |
| <i>parC</i> :pTRG | <i>parC</i> cloned into the NotI (5') and EcoRI (3') sites of pTRG  | This study           |
| <i>parP</i> :pBT  | <i>parP</i> cloned into the NotI (5') and EcoRI (3') sites of pBT   | This study           |
| tPA2867:pTRG      | tPA2867 cloned into the EcoRI (5') and XhoI (3') sites of pTRG      | This study           |

540

541

542

543

544

545

546

547 **Supplemental Table 2: Strains used in this study**

| <b>Strain</b>                                                     | <b>Description</b>                                                                                                                                       | <b>Source</b>                                              |
|-------------------------------------------------------------------|----------------------------------------------------------------------------------------------------------------------------------------------------------|------------------------------------------------------------|
| <i>E. coli</i> BacterioMatch II Two-Hybrid System Reporter Strain | $\Delta(mcrA)183 \Delta(mcrCB-hsdSMR-mrr)173 endA1 hisB supE44 thi-1 recA1 gyrA96 relA1 lac [F' lacI^q HIS3 aadA Kan^r]$                                 | Agilent Technologies                                       |
| <i>E. coli</i> XL-1 Blue MRF' kan <sup>r</sup>                    | $\Delta(mcrA)183 \Delta(mcrCB-hsdSMR-mrr)173 endA1 supE44 thi-1 recA1 gyrA96 relA1 lac [F' proAB lacI^q Z\Delta M15 Tn5 (Kan^r)]$                        | Agilent Technologies                                       |
| <i>E. coli</i> XL-1 Blue MRF' tet <sup>r</sup>                    | $recA1 endA1 gyrA96 thi-1 hsdR17 supE44 relA1 lac [F' proAB lacI^q Z\Delta M15 Tn10 (Tet^r)]$                                                            | Agilent Technologies                                       |
| <i>E. coli</i> S17-1                                              | $Tp^R Sm^R recA thi pro hsdR^- M+ RP4 2-Tc::Mu-Km::Tn7 \lambda pir$                                                                                      | [39]                                                       |
| <i>E. coli</i> NEB5 $\alpha$                                      | $fhuA2 \Delta(argF-lacZ)U169 phoA glnV44 \Phi80 \Delta(lacZ)M15 gyrA96 recA1 relA1 endA1 thi-1 hsdR17$                                                   | New England Biolabs                                        |
| PAO1                                                              | <i>P. aeruginosa</i> PAO1 (Iglewski strain)                                                                                                              | Carrie Harwood                                             |
| PAO1 <i>cheA-mTq</i>                                              | <i>cheA-mTq</i> at the native chromosomal site in PAO1                                                                                                   | This study                                                 |
| PAO1 $\Delta cheA$                                                | In-frame deletion of PA1458 ( <i>cheA</i> ) in PAO1                                                                                                      | This study                                                 |
| PAO1 $\Delta cheW$                                                | (+9) deletion of PA1464 ( <i>cheW</i> ) in PAO1                                                                                                          | This study                                                 |
| PAO1 $\Delta che I$                                               | In-frame deletions of PA1456 ( <i>cheY</i> ), PA1457 ( <i>cheZ</i> ), PA1458 ( <i>cheA</i> ), PA1459 ( <i>cheB</i> ), and PA1464 ( <i>cheW</i> ) in PAO1 | Carrie Harwood                                             |
| PAO1 $\Delta dipA$                                                | (+9) deletion of PA5017 ( <i>dipA</i> ) in PAO1                                                                                                          | This study                                                 |
| PAO1 <i>fliC::tn</i>                                              | Transposon (lacZ <sub>hah</sub> ) in PA1092 ( <i>fliC</i> ) in PAO1. Inserted at base 820 of 1467                                                        | University of Washington PAO1 transposon mutant collection |
| PAO1 $\Delta parC$                                                | In-Frame deletion of PA1462 ( <i>parC</i> ) in PAO1                                                                                                      | This study                                                 |
| PAO1 $\Delta parP$                                                | (+9) deletion of PA1463 ( <i>parP</i> ) in PAO1                                                                                                          | This study                                                 |

548

549

550

551 **Supplemental Table 3: Primers used in this study**

| <b>Primer name</b>          | <b>Sequence (5' to 3')</b>                     |
|-----------------------------|------------------------------------------------|
| <b>Gene deletion</b>        |                                                |
| <i>cheA</i> (Up)-for        | GCGACGAATTTCGAATCGACCCTG                       |
| <i>cheA</i> (Up)-rev        | CGGAAACCCATACGCGGCGTCGGCTGCTCCCAGAGACGTG       |
| <i>cheA</i> (Dn)-for        | CACGTCTCTGGGAGCAGCCGACGCCGCGTATGGGTTTCCG       |
| <i>cheA</i> (Dn)-rev        | GAGGATCCCTGCTTGAGCAGGCGCGCAC                   |
| <i>cheW</i> (Up)-for        | GCGACGAATTCCAGGCGCATTCAAGCCGCAC                |
| <i>cheW</i> (Up)-rev        | GTAGAACGCATCAGATGCTTTTGCTCATTCCCCTAACC         |
| <i>cheW</i> (Dn)-for        | GGTTAGGGGAATGAGCAAAAGCATCTGATGCGTTCTAC         |
| <i>cheW</i> (Dn)-rev        | GAGGATCCCTGGCCATTCTCCAGCACC                    |
| <i>dipA</i> (Up)-for        | ATAGGAATTCATCACCGACATGGAAGCCTTC                |
| <i>dipA</i> (Up)-rev        | GCCTGGGCGATCAGTGCAGACTTTTCATGCGAGGCTGATT<br>CC |
| <i>dipA</i> (Dn)-for        | GAATCAGCCTCGCATGAAAAGTCTGCACTGATCGCCCAGG<br>C  |
| <i>dipA</i> (Dn)-rev        | GAAAGAGCTCGCGCCAGCTCAAGCGTTTC                  |
| <i>parC</i> (Up)-for        | GAGAATTCCACGAACGCTGGCTGGTTTC                   |
| <i>parC</i> (Up)-rev        | CGGCGACCGGCGCGCCATGCTCTACTCTTCTGGCATG          |
| <i>parC</i> (Dn)-for        | CATGCCAGGAAGAGTAGAGCATGGCGCGCCGGTCGCCG         |
| <i>parC</i> (Dn)-rev        | GAGGATCCCTATCAATGGTTCGCCGTGCAG                 |
| <i>parP</i> (Up)-for        | GAGATGAATTCGTCGCCTTCGCCATGAGCG                 |
| <i>parP</i> (Up)-rev        | GAAGCTGTCTATCAATGGTTCGGCGCTCATGTGGGTATTCC      |
| <i>parP</i> (Dn)-for        | GGAATACCCACATGAGCGCCGACCATTGATAGACAGCTTC<br>CG |
| <i>parP</i> (Dn)-rev        | GAGATAAGCTTGAAGTGGCGAGCCGCCTG                  |
| <b>Bacterial two-hybrid</b> |                                                |
| <i>cheA</i> -pTRG-for       | GCGGATCCATGAGCTTCGACGCCGATGA                   |
| <i>cheA</i> -pTRG-rev       | CGGAATTCAGTCTACGCGGCACGCATTG                   |
| <i>dipA</i> -pBT/TRG-for    | AGACGCGGCCGCTATGAAAAGTCATCCCGATGCCGCC          |
| <i>dipA</i> -pBT/TRG-rev    | ATTGGAATTCTCAGTGCAGGGTGCAGGCGCAG               |
| <i>parC</i> -pBT/TRG-for    | AGCGGCCGCTATGAAAGTCTGGGCAGTCG                  |
| <i>parC</i> -pBT/TRG-rev    | ATACGAATTCTCAGGCCACCCGGGTGGC                   |
| <i>parP</i> -pBT/TRG-for    | AGCGGCCGCTATGAGCGCCGCCACCGCC                   |
| <i>parP</i> -pBT/TRG-rev    | ATACGAATTCTCAATGGTTCGCCGTGCAGG                 |
| tPA2867-pTRG-for            | ATACGAATTCTTTTCATCCTCACCCACCTGC                |
| PA2867-pBT/TRG-rev          | ATACCTCGAGTCAGAGGCGTAGCTGGCCG                  |

552

553

554

555



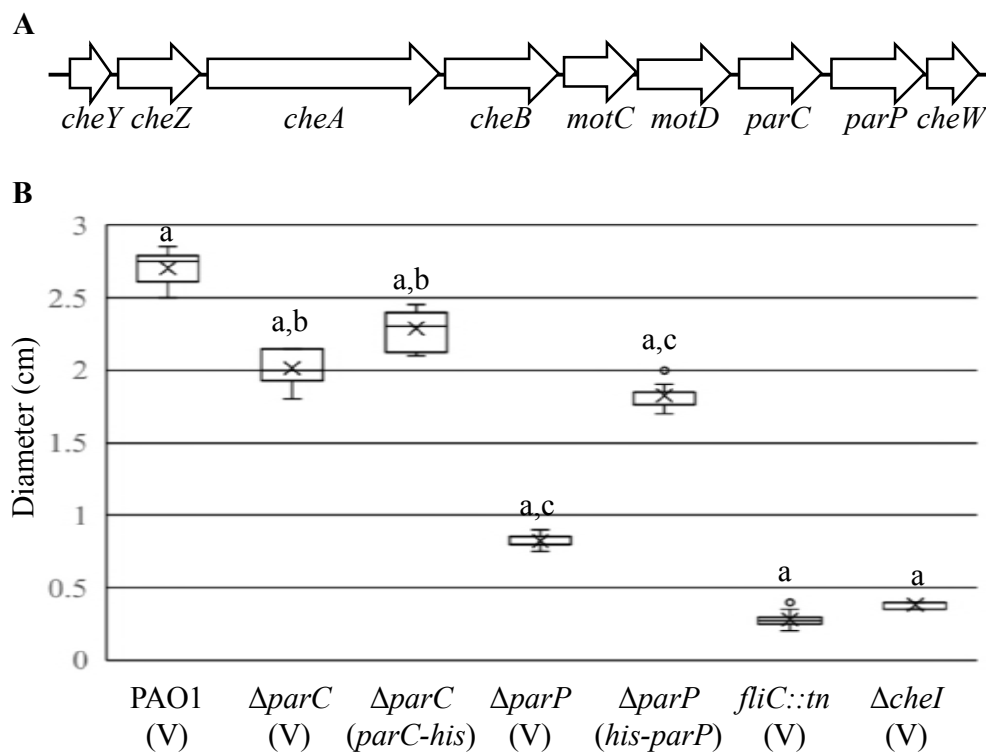

**Fig. 1.** Par-like proteins encoded within chemotaxis gene cluster I (*che I*) are required for optimal swimming motility. A) *che I* gene cluster of *P. aeruginosa* (drawn to scale). B) Swimming motility assay of wild type (PAO1) and indicated *P. aeruginosa* strains.  $\Delta che I$  strain lacks the chemotaxis genes *cheY*, *cheZ*, *cheA*, *cheB*, and *cheW*. The average swimming diameter measurements are shown and error bars denote the standard error of the mean. Matching letters indicate statistically significant differences,  $p < 0.001$ . (V) indicates empty vector (pJN105).

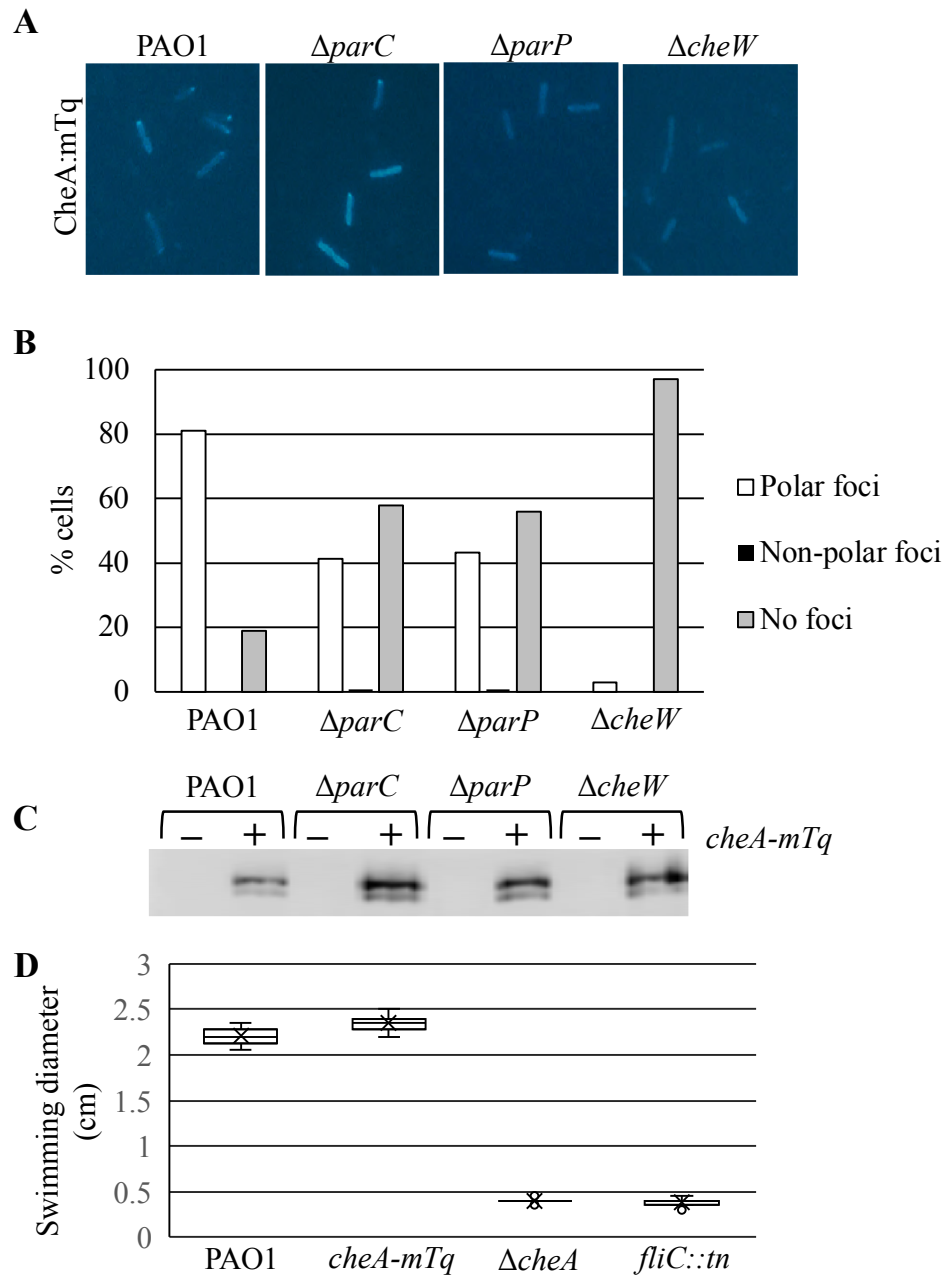

**Fig. 2.** The Par-like proteins affect chemotaxis protein localization. A) Representative images of CheA:mTq foci formation in wild type (PAO1) and indicated *P. aeruginosa* strains. B) Quantitation of CheA:mTq foci localization in the indicated *P. aeruginosa* strains. 248 cells per strain were counted. C) CheA:mTq expression levels as determined through western blotting. D) Expression of CheA:mTq supports swimming motility. Average swimming diameter is shown and error bars denote the standard error of the mean. All values were significantly different from wild type,  $p < 0.001$ .



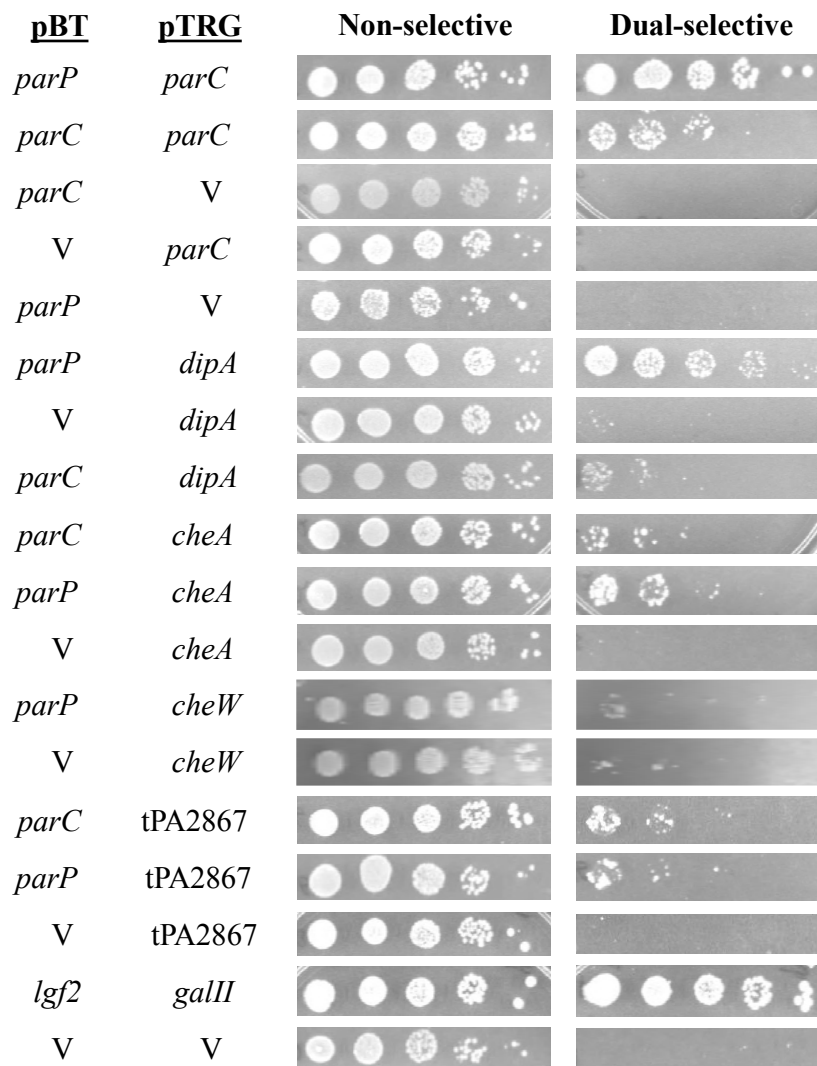

**Fig 3.** DipA interacts directly with ParP, as demonstrated by a bacterial two-hybrid assay. 5  $\mu$ l of a 10-fold dilution series are spotted from left to right. Cultures on the non-selective media function as a loading control, while dual-selective media reveals the strength of the protein-protein interactions. Strong interactions have growth to the right-most spot, as indicated by the positive control *lgf2* and *galII*.

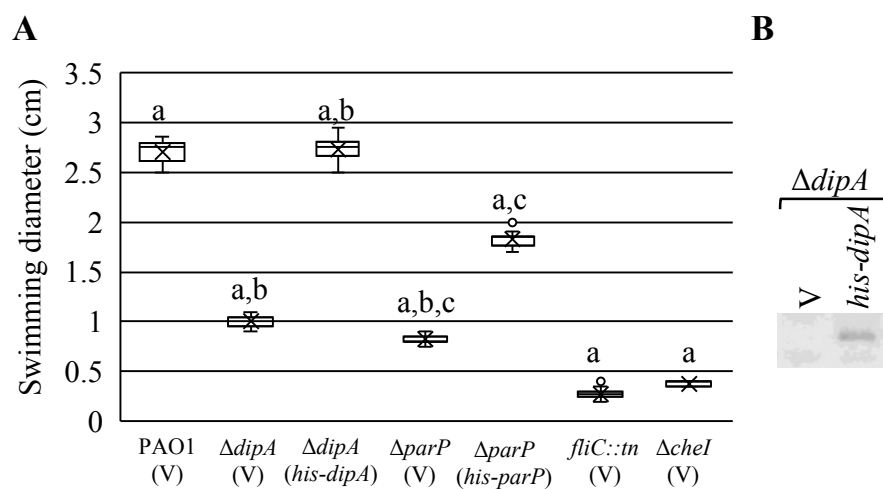

**Fig. 4.** Deletion of DipA results in a similar reduction of swimming motility as seen in  $\Delta parP$ . (A) Swimming motility assay of indicated *P. aeruginosa* strains. The averaged swimming diameters are shown and error bars denote standard error of the mean. Matching letters indicate statistically significant differences,  $p > 0.001$ . (B) Western blot showing expression of His-DipA.

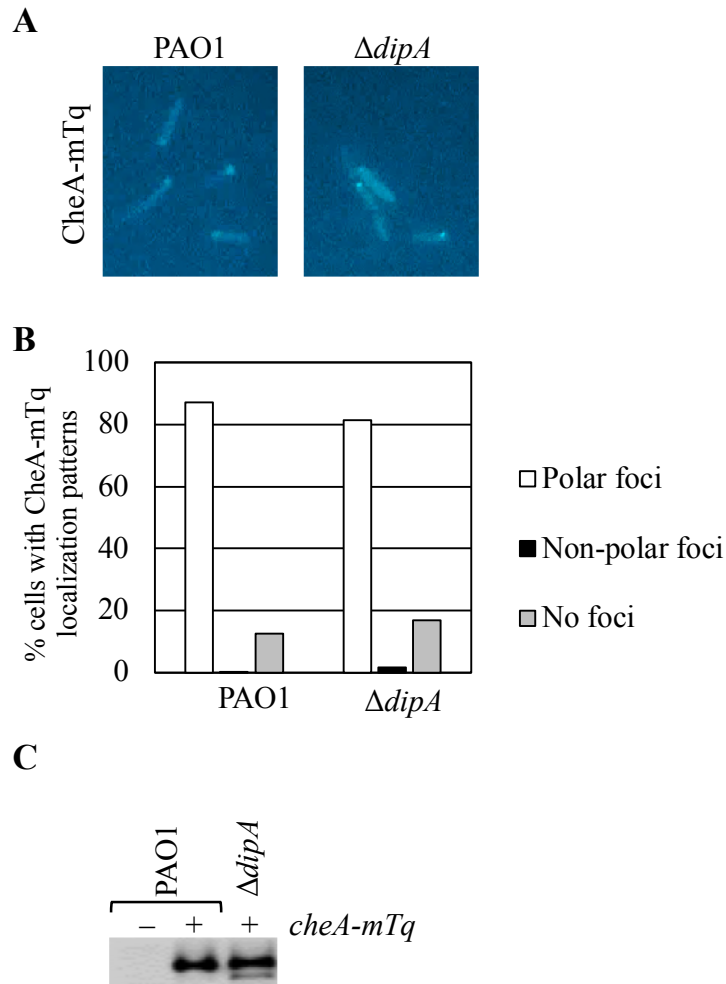

**Fig. 5.** DipA is not required for CheA foci formation or localization. (A) Representative images of CheA-mTq foci formation in wild type and mutant *P. aeruginosa* strains. (B) Quantitation of CheA-mTq foci formation and localization in the indicated *P. aeruginosa* strains. 300 cells were counted per strain. (C) Western blot showing CheA-mTq levels.

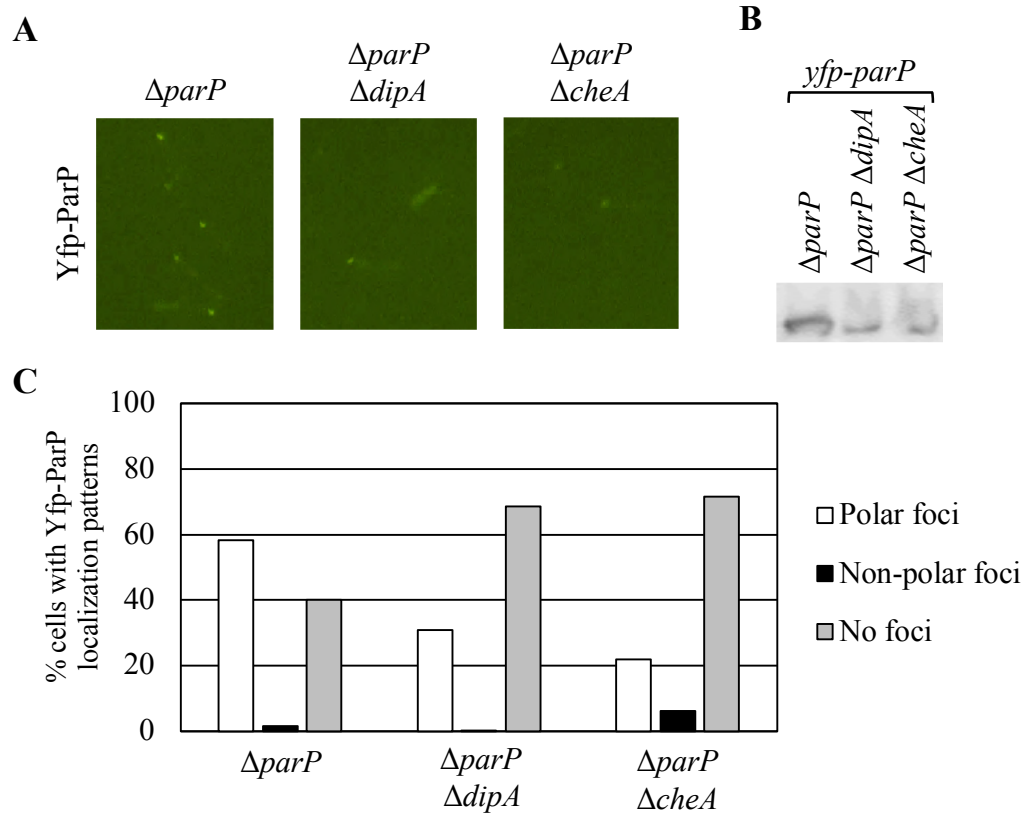

**Fig. 6.** DipA and CheA influence ParP foci formation. (A) Representative images of Yfp-ParP foci formation in wild type and mutant *P. aeruginosa* strains. (B) Western blot showing Yfp-ParP levels in the indicated strains. (C) Quantitation of Yfp-ParP foci formation and localization patterns in the indicated *P. aeruginosa* strains. 300 cells were counted per strain.

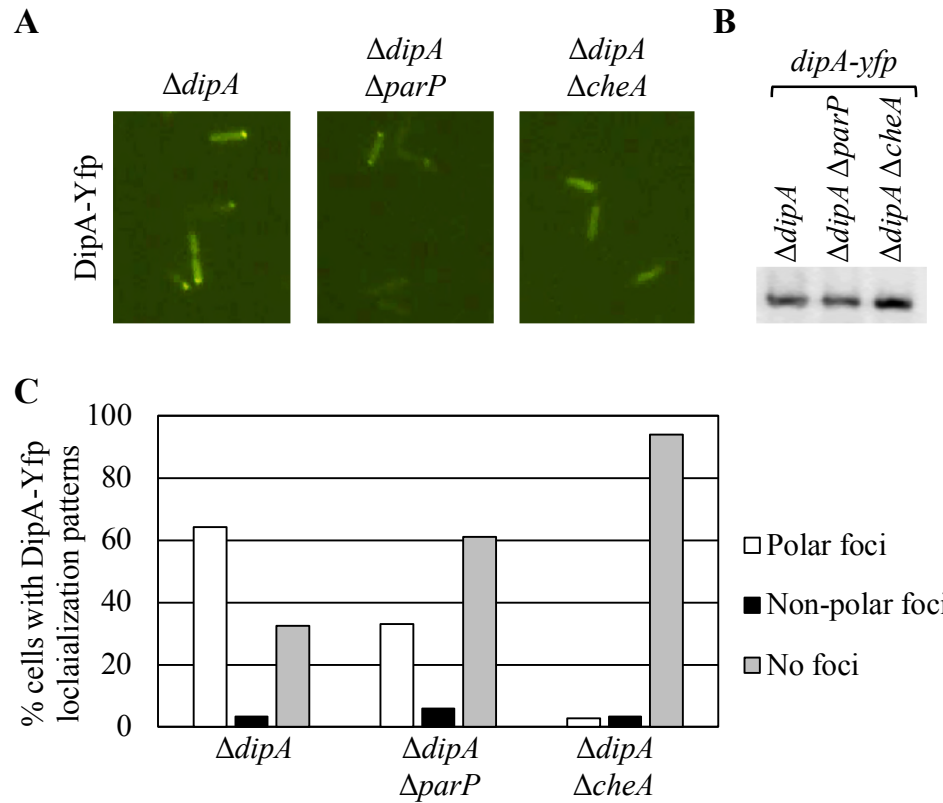

**Fig. 7.** DipA foci formation is influenced by ParP and dependent on CheA. (A) Representative images of DipA-Yfp foci formation in wild type and mutant *P. aeruginosa* strains. (B) Western blot showing DipA-Yfp levels in the indicated strains. (C) DipA-Yfp foci formation and localization patterns in the indicated *P. aeruginosa* strains. 300 cells were counted per strain.

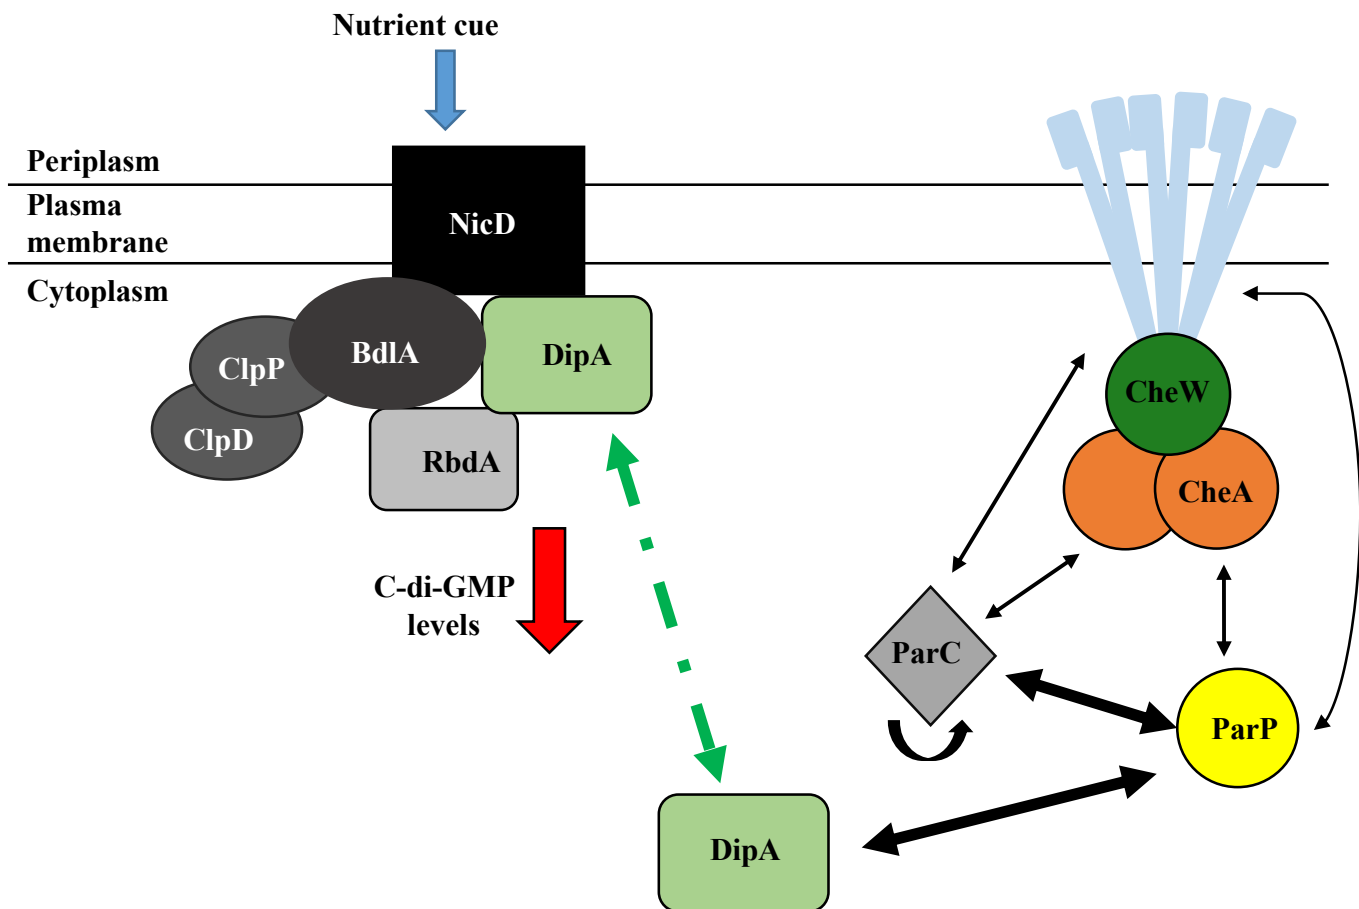

**Fig. 8.** Model showing B2H interactions linking the Par-like proteins with the chemotaxis and biofilm dispersion systems of *P. aeruginosa*. Black arrows indicate direct protein-protein interactions, with thicker arrows being a stronger interaction. The green dashed arrow points to the different roles that DipA has in regards to biofilm dispersion and chemotaxis. The red arrow pointing down indicates a decrease in c-di-GMP levels. The blue arrow represents a nutrient cue that is sensed by NicD.
